# Supplementary material
Source: PubMed Central journal article supplement (PMC3162623)
Supplement: NIHMS308785-supplement-Supplement_1_and_2.pdf [file NIHMS308785-supplement-Supplement_1_and_2.pdf]

**APPENDIX 1: Rapid Estimate of Adult Literacy in Medicine (REALM)**

ASK THE RESPONDENT TO READ ALOUD THE FOLLOWING WORDS, STARTING FROM LIST 1 AND THEN LIST 2 AND LIST 3.

Here are three lists of words. Please read them aloud to me. (GIVE EACH LIST TO RESPONDENT. CHECK WORDS HE/SHE CAN READ/PRONOUNCE CORRECTLY.)

| <u>List 1</u>  | <u>List 2</u>      | <u>List 3</u>      |
|----------------|--------------------|--------------------|
| fat _____      | fatigue _____      | allergic _____     |
| flu _____      | pelvic _____       | menstrual _____    |
| pill _____     | jaundice _____     | testicle _____     |
| dose _____     | infection _____    | colitis _____      |
| eye _____      | exercise _____     | emergency _____    |
| stress _____   | behavior _____     | medication _____   |
| smear _____    | prescription _____ | occupation _____   |
| nerves _____   | notify _____       | sexually _____     |
| germs _____    | gallbladder _____  | alcoholism _____   |
| meals _____    | calories _____     | irritation _____   |
| disease _____  | depression _____   | constipation _____ |
| cancer _____   | miscarriage _____  | gonorrhea _____    |
| caffeine _____ | pregnancy _____    | inflammatory _____ |
| attack _____   | arthritis _____    | diabetes _____     |
| kidney _____   | nutrition _____    | hepatitis _____    |
| hormones _____ | menopause _____    | antibiotics _____  |
| herpes _____   | appendix _____     | diagnosis _____    |
| seizure _____  | abnormal _____     | potassium _____    |
| bowel _____    | syphilis _____     | anemia _____       |
| asthma _____   | hemorrhoids _____  | obesity _____      |
| rectal _____   | nausea _____       | osteoporosis _____ |
| incest _____   | directed _____     | impetigo _____     |

Score \_\_\_\_\_

**APPENDIX 2: The 50 items of SAHLSA, rank-ordered according to the parameter *b* of item difficulty (keys and distracters are listed in the same random order as in the field interview)**

| <b>Stem</b>           | <b>Key or Distracter</b> |                |         |
|-----------------------|--------------------------|----------------|---------|
| 1. próstata           | __glándula               | __circulación  | __no se |
| 2. empleo             | __trabajo                | __educación    | __no se |
| 3. menstrual          | __mensual                | __diario       | __no se |
| 4. gripe              | __sano                   | __enfermo      | __no se |
| 5. avisar             | __medir                  | __decir        | __no se |
| 6. comidas            | __cena                   | __paseo        | __no se |
| 7. alcoholismo        | __adicción               | __recreo       | __no se |
| 8. grasa              | __naranja                | __mantequilla  | __no se |
| 9. asma               | __respirar               | __piel         | __no se |
| 10. cafeína           | __energía                | __agua         | __no se |
| 11. osteoporosis      | __hueso                  | __músculo      | __no se |
| 12. depresión         | __apetito                | __sentimientos | __no se |
| 13. estreñimiento     | __bloqueado              | __suelto       | __no se |
| 14. embarazo          | __parto                  | __niñez        | __no se |
| 15. incesto           | __familia                | __vecinos      | __no se |
| 16. pastilla          | __tableta                | __galleta      | __no se |
| 17. testículo         | __óvulo                  | __esperma      | __no se |
| 18. rectal            | __regadera               | __inodoro      | __no se |
| 19. ojo               | __oír                    | __ver          | __no se |
| 20. irritación        | __rígido                 | __adolorido    | __no se |
| 21. abnormal          | __diferente              | __similar      | __no se |
| 22. estrés            | __preocupación           | __feliz        | __no se |
| 23. aborto espontáneo | __pérdida                | __matrimonio   | __no se |
| 24. ictericia         | __amarillo               | __blanco       | __no se |
| 25. pánico            | __prueba                 | __vacuna       | __no se |
| 26. impétigo          | __pelo                   | __piel         | __no se |
| 27. indicado          | __instrucción            | __decisión     | __no se |
| 28. ataque            | __herida                 | __sano         | __no se |
| 29. menopausia        | __señoras                | __niñas        | __no se |
| 30. apéndice          | __rascar                 | __dolor        | __no se |
| 31. comportamiento    | __pensamiento            | __conducta     | __no se |
| 32. nutrición         | __saludable              | __gaseosa      | __no se |
| 33. diabetes          | __azúcar                 | __sal          | __no se |
| 34. sífilis           | __anticonceptivo         | __condón       | __no se |
| 35. inflamatorio      | __hinchazón              | __sudor        | __no se |
| 36. hemorroides       | __venas                  | __corazón      | __no se |
| 37. herpes            | __aire                   | __sexo         | __no se |
| 38. alérgico          | __resistencia            | __reacción     | __no se |
| 39. riñón             | __orina                  | __fiebre       | __no se |
| 40. calorías          | __alimentos              | __vitaminas    | __no se |
| 41. medicamento       | __instrumento            | __tratamiento  | __no se |
| 42. anemia            | __sangre                 | __nervio       | __no se |
| 43. intestinos        | __digestión              | __sudor        | __no se |
| 44. potasio           | __mineral                | __proteína     | __no se |

|                     |             |                |         |
|---------------------|-------------|----------------|---------|
| 45. colitis         | __intestino | __vejiga       | __no se |
| 46. obesidad        | __peso      | __altura       | __no se |
| 47. hepatitis       | __pulmón    | __hígado       | __no se |
| 48. vesícula biliar | __arteria   | __órgano       | __no se |
| 49. convulsiones    | __mareado   | __tranquilo    | __no se |
| 50. artritis        | __estómago  | __articulación | __no se |

### APPENDIX 3: Instruction for Administering SAHLSA-50

#### SHORT ASSESSMENT OF HEALTH LITERACY IN SPANISH-SPEAKING ADULTS (SAHLSA-50)

##### Interviewer's Instruction

The *Short Assessment of Health Literacy in Spanish-speaking Adults*, or *SHLSA-50*, contains 50 test items designed to assess a Spanish-speaking adult's ability to read and understand common medical terms. The test could help health professionals estimate the adult's health literacy level. Administration of the test could be facilitated by using laminated 4"×5" flash cards, with each card containing a medical term printed in boldface on the top and the two association words—i.e., the key and the distracter—at the bottom.

##### Directions to the Interviewer:

1. Before the test, the interviewer should say to the examinee:  
*"Le voy a mostrar tarjetas con 3 palabras en ellas. Primero, me gustaría que usted lea la palabra arriba en voz alta. Entonces, yo leeré las dos palabras debajo a usted y me gustaría que usted me dijera cuál de las dos palabras es más similar a la palabra arriba. Si usted no sabe la respuesta, por favor diga, 'no se'. No adivine."*
2. Show the examinee the first card.
3. The interviewer should say to the examinee:  
*"Ahora, por favor, lea la palabra arriba en voz alta."*
4. The interviewer should have a clipboard with a score sheet to record the examinee's answers. The clipboard should be held such that the examinee cannot see or be distracted by the scoring procedure.
5. The interviewer will then read the key and distracter (the two words at the bottom of the card) and then say:  
*"Cuál de las dos palabras es más similar a la palabra arriba? Si usted no sabe la respuesta, por favor diga, 'no se'."*
6. The interviewer may repeat the instructions so that the examinee feels comfortable with the procedure.
7. Continue the test with the rest of the cards.
8. A correct answer for each test item is determined by both correct pronunciation and accurate association. Each correct answer gets one point. Once the test is completed, the interviewer should tally the total points to generate the *SAHLSA-50* score.
9. A score between 0 and 37 suggests the examinee has inadequate health literacy.
